# Supplementary material for: Comparative Analysis of Five Multiplex RT-PCR Assays in the Screening of SARS-CoV-2 Variants
Source: MDPI journal article supplement (doi:10.3390/microorganisms10020306), 2022-01-27
Supplement: s1 [file s1]

**Table S1.** Analysis and interpretation of melting peaks results for L452 and E484 mutations (UltraGene Assay SARS-CoV-2 452R & 484K & 484Q Mutations V1).

|                       | Melting peak (C°) | Analysis and interpretation |
|-----------------------|-------------------|-----------------------------|
| <i>Mutation L452R</i> | >65               | L452R                       |
|                       | 61-65             | L452 Wild Type              |
|                       | <61               | Other L452 mutation         |
|                       | No peaks          | Uninterpretable             |
| <i>Mutation E484</i>  | >63               | E484K                       |
|                       | 59-63             | E484Q                       |
|                       | 55-59             | E484E (wild type)           |
|                       | <55               | Other E484 mutation         |
|                       | No peaks          | Uninterpretable             |

Melting temperature (T<sub>m</sub>) ranges for 452 and 484 positions are calculated using CFX96 instrument thermal cycler of seven reference controls harboring or not mutations L452R, E484K or E484Q. Samples with melting temperature < 61°C are characterized by L452Q mutation as confirmed by whole genome sequencing. The identification of Delta variant changes the T<sub>m</sub> of E484 target that it decreases from 57°C to 56°C for the presence of T478K mutation.

**Table S2.** Analysis of results through temperature melting ranges for L452, E484 and N501Y mutations (SARS-CoV-2 Extended ELITE MGB).

|                       | Temperature melting range (C°) | Result               |
|-----------------------|--------------------------------|----------------------|
| <i>Mutation L452R</i> | 54-61                          | L452R                |
|                       | 61.1-68                        | L452R NOT detected   |
| <i>Mutation E484</i>  | 59.5-63.9                      | E484K                |
|                       | 56-59.4                        | E484Q                |
|                       | 64-70                          | E484K/Q NOT detected |
| <i>Mutation N501Y</i> | 61-67                          | N501Y                |
|                       | 54-60.9                        | N501Y NOT detected   |

Internal Control endogenous is amplified for each sample. All steps are automatically performed on ELITE InGenius instrument using FAM, AP593, AP639 and AP525 for the 484, 501, 452 and internal control respectively. Temperature melting <sup>TM</sup> values of the wild type and positive controls must be interpreted together to the T<sub>m</sub> of negative control according to the manufacturer instructions.

**Table S3.** Reference melting temperature ranges for the interpretation of the L452R, E484 and N501Y mutation of samples tested (Simplexa SARS-CoV-2 Variants Direct).

|                       | Melting temperature (C°) | Variant interpretation |
|-----------------------|--------------------------|------------------------|
| <i>Mutation L452R</i> | 54.3-57.9                | L452R                  |
|                       | 48.7-52.1                | L452 NOT detected      |
| <i>Mutation E484</i>  | 51.2-54.6                | E484K                  |
|                       | 46.7-51.1                | E484Q                  |
|                       | 43.8-46.6                | E484 NOT detected      |
| <i>Mutation N501Y</i> | 64.8-69.0                | N501Y                  |
|                       | 60.9-64.7                | N501Y NOT detected     |

Detection of the Simplexa RNA Internal Control is not required for a valid result. The fluorescent signal for each specific probe is read using CFX96 instrument thermal cycler through channel 610 for L452R mutation; channel 560 for E484 mutation and channel 520 for N501Y mutation. T<sub>m</sub> values of the wild type samples are the same of the positive control of reference.
